# Supplementary material for: Text Performance on the Vine Stage? The Effect of Incentive on Product Review Text Quality
Source: Atypon-hosted journal article supplement (doi:10.1287/isre.2022.1146), 2022-07-13
Supplement: isre.2022.1146.sm1.pdf [file isre.2022.1146.sm1.pdf]

## **Appendix. Aspect Terms for the Category “Electronics”**

### **Aspect 1 (Peripheral Features)**

rigid bend insulation thick sheathing grip outer molded joint reinforced pliable foil secured stiff rubbery coating casing bending seam shaft strand wrapped sheath rubberized covering fabric housing grippy velcro rod twisting jacket zipper collar cutout underneath securing curved woven pivot wedge underside threaded glued sticky bent bendable tightening tighten tension

### **Aspect 2 (Brands and Models)**

david quincy lee vsonic wesselmann lp2 p5 woodies hd558 urbanite jones m100 hd555 genesis exquisite simon h8 ue900 4ps celebrity signature cop urbanites shadow m1 mc3 hd595 vmoda klare synthetic transparency lr revealing munitio kaufempfehlung m80 mixture 300s overtone positively inspired dick legendary debbie aggressive verarbeitung hm9 s4a taylor diamond

### **Aspect 3 (Earbuds and Sports)**

earphone earbuds headphone headset bud ear earplug earbud pair wore earpiece worn sennheisers etymotics gym shure exercising wearing jogging time readjust hurt iems iem sonys uncomfortable workout shures wear discomfort sweating jbuds skull sweaty hour treadmill flight hurting painful day skullcandy can plane falling canal constantly eventually awhile tip week

### **Aspect 4 (Price and Style)**

affordable portability attractive stylish great overall terrific excellent practical exceptional compact portable fantastic versatile comparable wise outstanding awesome good decent value summary amazing convenience worthy versatility nice inexpensive price considering phenomenal elegant economical sleek wonderful rugged superb innovative compactness sacrifice competitive robust fabulous sexy lightweight reasonable superior disappoint durable definitely

### **Aspect 5 (Refurbishment Policy)**

refurbished refurb seller vendor sale reconditioned rebate pissed costco exchanging employee crutchfield paid exchange repaired manufacture returned lemon faith ordering thankful supplier ebay merchandise shipped unhappy accepted trusted waited refund dud authorized bestbuy recieved amazon merchant honor dealer sold sorry returning refunded mart exchanged guarantee rma retailer counterfeit inventory woot

**Aspect 6 (Movement and Control)**

macro onscreen gesture sequence keypad function activate navigating touchscreen navigation reprogram intuitive ui scrolling shortcut operation programmable intuitively menu button programing programming remote backlight startup configure disable customization override manually navigate customizing unresponsive red-eye unlock programmed command swipe activating swiping backlighting confusing scroll behavior toggling gui app interact mapping accessing

**Aspect 7 (Usage Scenarios)**

dinner relaxing cooking cook breakfast jamming backyard rocking grilling listens showering bbq afternoon dancing meal drinking park relax fishing bedtime college slept blasted queen bird housework season screaming van evening garage bath busy fighting washing beer enjoys blaring garden drink blasting lake singing tailgate church woke ski dance charlie teenage

**Aspect 8 (Hardware Relevant)**

feed spdif chromecast appletv hardwired lan vga decoder dvi playstation toshiba htpc rca av hdtv oppo roku hookup mhl equipped wirelessly pc receiver verse splitter composite pvr via xbox360 gateway coaxial arc passthrough connect switcher tv ethernet ps3 coax television dlna stb ps2 converter bluray camcorder voila toslink blueray att

**Aspect 9 (Sound Relevant)**

sound imaging presence midrange separation tonal clarity tonality reproduction vocal bass richness musicality dialogue soundstage timbre reproduced crispness sounded mids muddiness undistorted punchy boomy distortion spatial accuracy staging loudness resonance delivering sonically fullness realism soundscape distinct openness midranges dialog reproducing tone booming midtones sounding sharpness expansive harshness overpowering depth lifelike

**Aspect 10 (Model Parameters)**

volt 10w mah 2a 5w battery 12v 5v 800mah approx 2000mah 7v 2v nominal watt 2500mah 3w lithium rms alkalines 1a meter dc 9v inverter approximately li 120v consumption tenergy ion whopping discharge capacity ounce alkaline aa indefinitely recharged voltage batter 100w hr pound va remaining peak mh runtime rechargables
